# Supplementary material for: Zero-dimensional heterostructures: N-doped graphene dots/SnO2 for ultrasensitive and selective NO2 gas sensing at low temperatures
Source: Royal Society of Chemistry journal article supplement (doi:10.1039/d0ta03037f), 2020-01-01
Supplement: d0ta03037f1.pdf [file d0ta03037f1.pdf]

## Electronic Supplementary Information (ESI)

### Zero-dimensional Heterostructures: N-Doped Graphene Dots/SnO<sub>2</sub> for Ultrasensitive and Selective NO<sub>2</sub> Gas Sensing at Low Temperatures

Rahul Purbia<sup>a</sup>, Yeong Min Kwon<sup>b</sup>, Hong-Dae Kim<sup>c</sup>, Yun Sik Lee<sup>d</sup>, Heungjoo Shin<sup>e</sup>, and Jeong

Min Baik<sup>a\*</sup>

<sup>a</sup>School of Advanced Materials Science and Engineering,  
Sungkyunkwan University (SKKU), 2066 Seoburo, Suwon 16419, South Korea  
E-mail: [jmbaik97@gmail.com](mailto:jmbaik97@gmail.com)

<sup>b</sup>School of Materials Science and Engineering,  
Ulsan National Institute of Science and Technology (UNIST), Ulsan, 44919, Republic of Korea.

<sup>c</sup>Green Materials and Processes Group,  
Korea Institute of Industrial Technology (KITECH), Ulsan, 44413, Republic of Korea.

<sup>d</sup>School of Electrical and Computer Engineering,  
Ulsan National Institute of Science and Technology (UNIST), Ulsan, 44919, Republic of Korea.

<sup>e</sup>School of Mechanical Engineering,  
Ulsan National Institute of Science and Technology (UNIST), Ulsan, 44919, Republic of Korea.

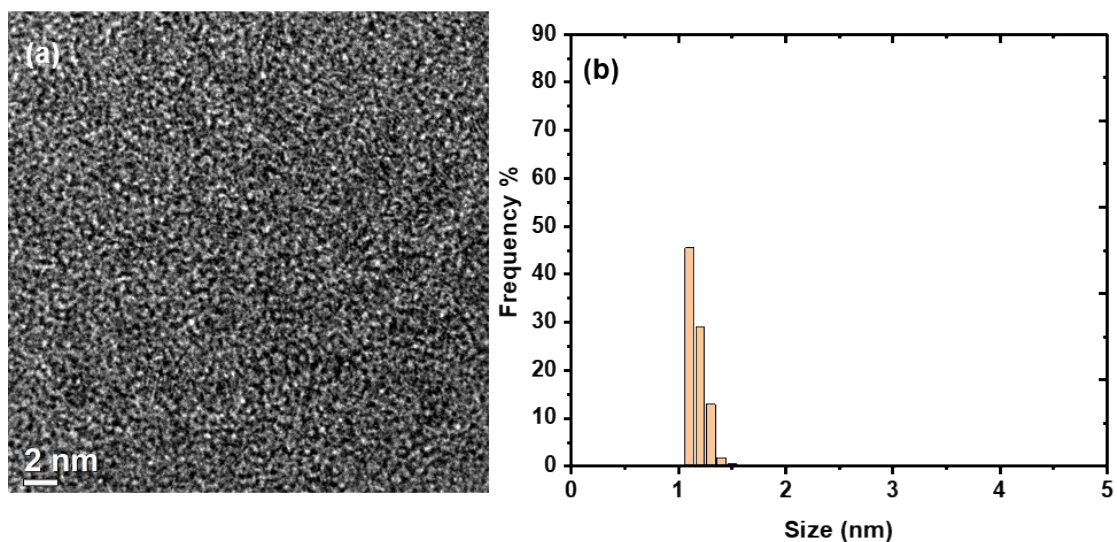

**Figure S1** HR-TEM image and size distribution of N-doped graphene dots obtained in the area.

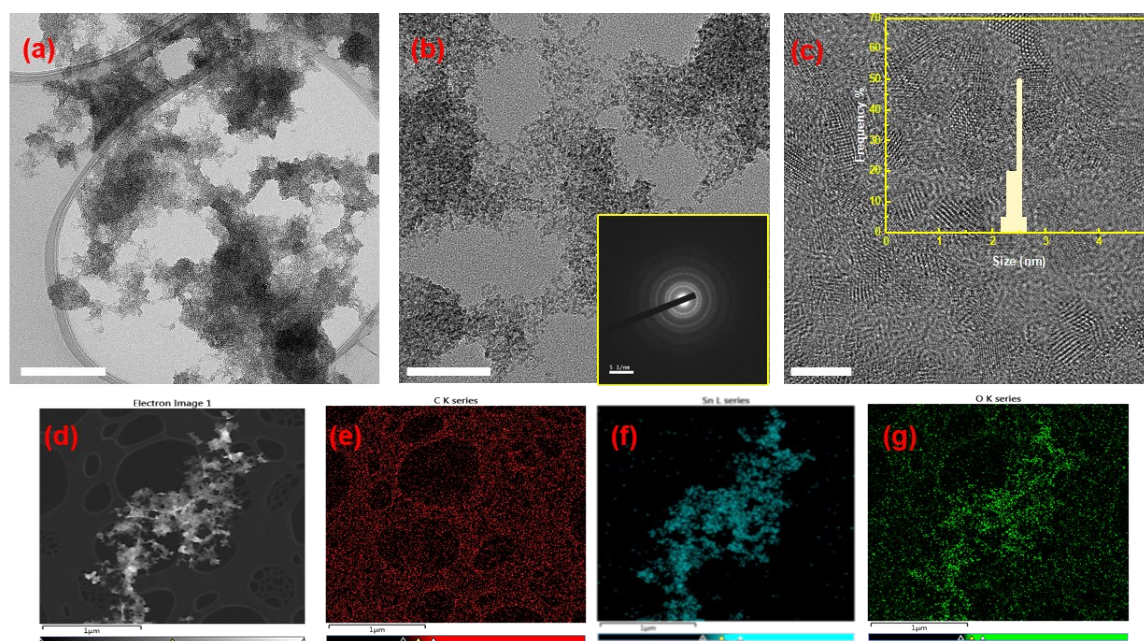

**Figure S2** (a-b) TEM image (inset of b SAED pattern), (c) HR-TEM images with size distribution of pristine SnO<sub>2</sub> NPs, (d-g) STEM-EDS mapping of Sn, O, C elements (Scale bar of (a-b) 50 nm, (c) 5 nm, (d-g) 1 μm.)

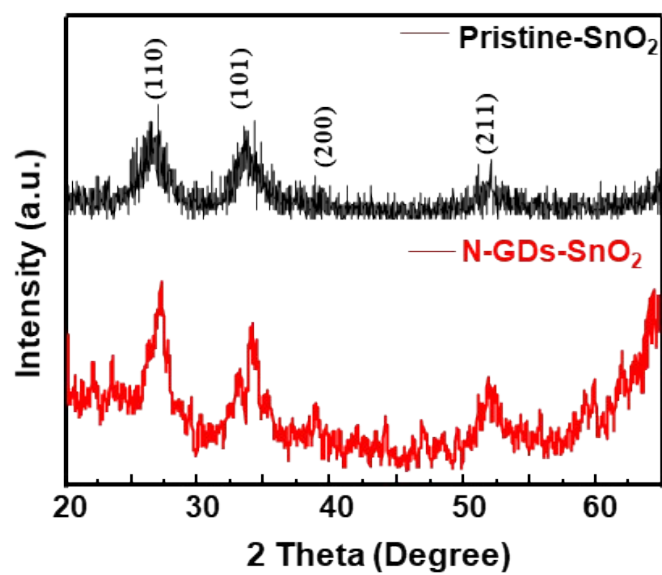

**Figure S3** XRD spectra of pristine SnO<sub>2</sub> and N-GDs-SnO<sub>2</sub>

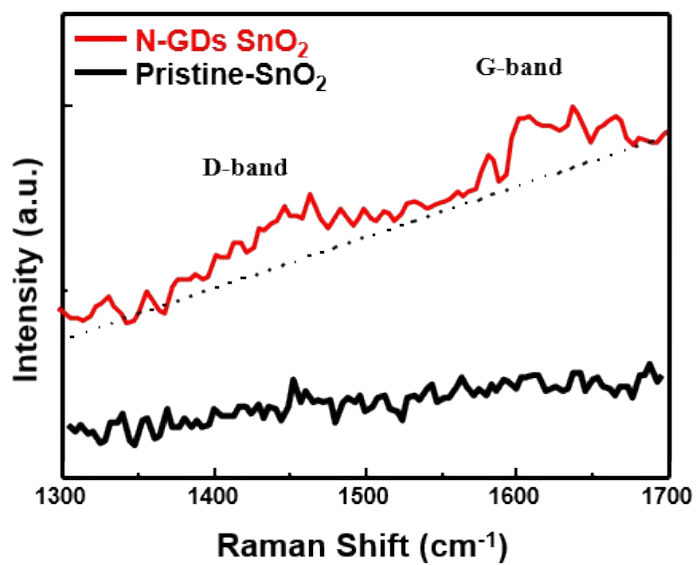

**Figure S4** Raman spectra of pristine SnO<sub>2</sub> and N-GDs-SnO<sub>2</sub>.

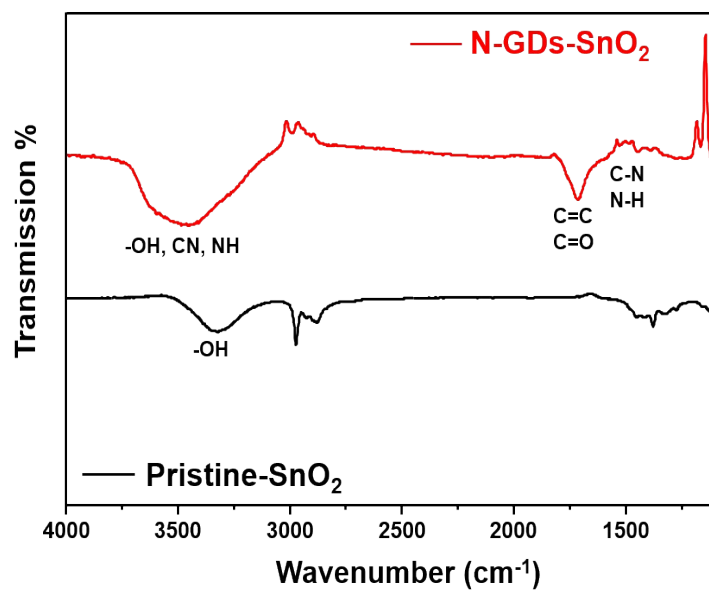

**Figure S5** FT-IR spectra of pristine SnO<sub>2</sub> and N-GDs-SnO<sub>2</sub>.

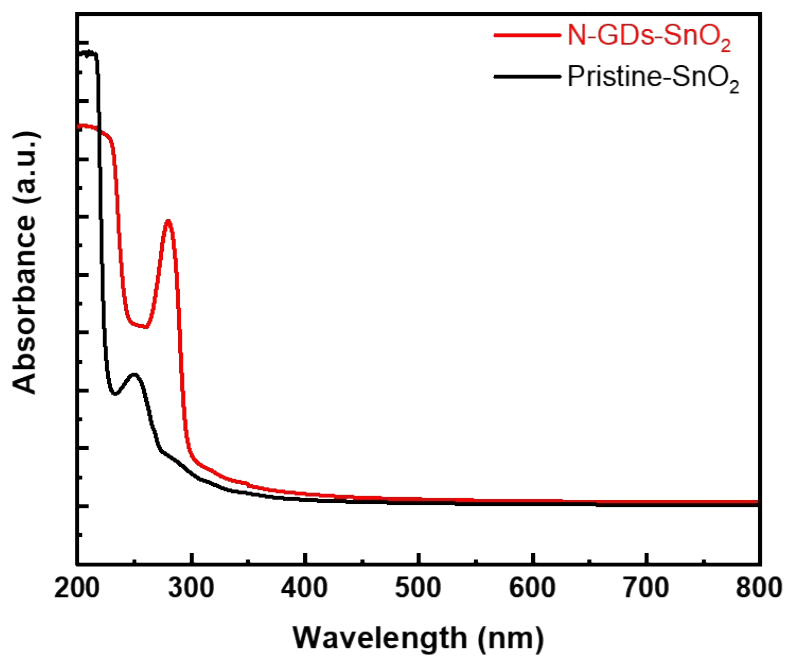

**Figure S6** UV-vis spectra of pristine SnO<sub>2</sub> and N-GDs-SnO<sub>2</sub>.

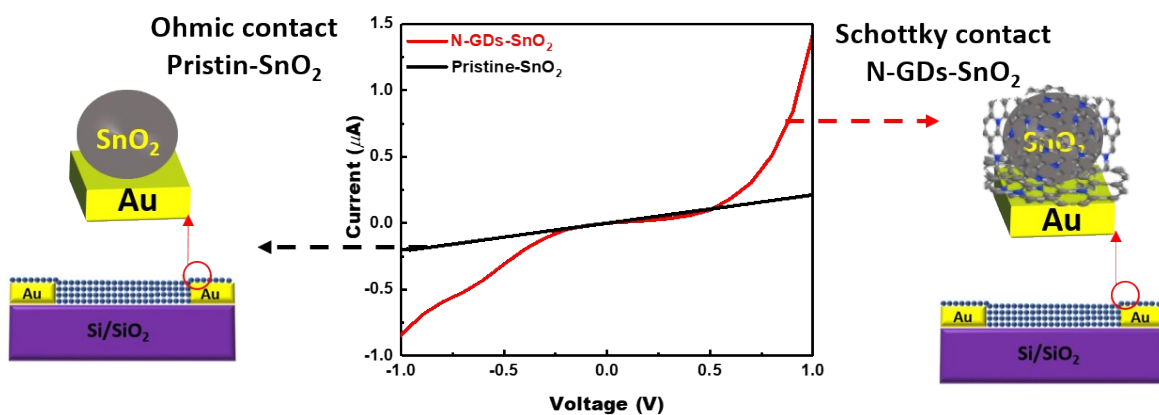

**Figure S7**  $I$ - $V$  characteristics of pristine  $\text{SnO}_2$  and N-GDs- $\text{SnO}_2$  at room temperature with schematic interface.

**Table S1:** Calculated sensing response, Response time, recovery time of P- $\text{SnO}_2$  and N-GDs- $\text{SnO}_2$ .

| Temp. | P- $\text{SnO}_2$   |                     |                        | N-GDs- $\text{SnO}_2$ |                     |                        |
|-------|---------------------|---------------------|------------------------|-----------------------|---------------------|------------------------|
|       | Response time (min) | Recovery time (min) | Response ( $R_g/R_a$ ) | Response time (min)   | Recovery time (min) | Response ( $R_g/R_a$ ) |
| Room  | 26                  | NO                  | NO                     | 27.3                  | more than 120 min   | 419                    |
| 50    | 21                  | 6                   | 1                      | 8.8                   | 6.4                 | 4336                   |
| 100   | 15                  | 35                  | 4                      | 7.8                   | 3.2                 | 2746                   |
| 150   | 9                   | 8.2                 | 6                      | 3.1                   | 0.81                | 292                    |
| 200   | 6                   | 3.11                | 6                      | 3.5                   | 0.80                | 53                     |
| 250   | 2.8                 | 0.79                | 3                      | 2.8                   | 0.75                | 5                      |

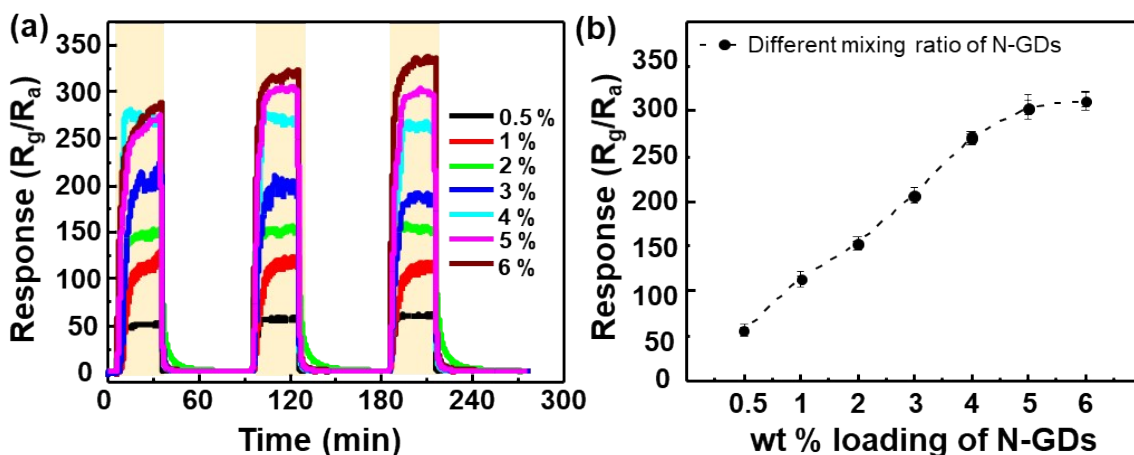

**Figure S8** (a) NO<sub>2</sub> gas sensing characteristics with different N-GDs mixing ratio (0.5 % (50  $\mu$ l), 1 % (100  $\mu$ l), 2 % (200  $\mu$ l), 3 % (300  $\mu$ l), 4 % (400  $\mu$ l), 5 % (500  $\mu$ l), 6 % (600  $\mu$ l)) with 10 ml SnO<sub>2</sub> composites and tested sensing device at 150°C towards 100 ppb NO<sub>2</sub>, (b) the average response of NO<sub>2</sub> gas sensing as a function of different N-GDs concentration.

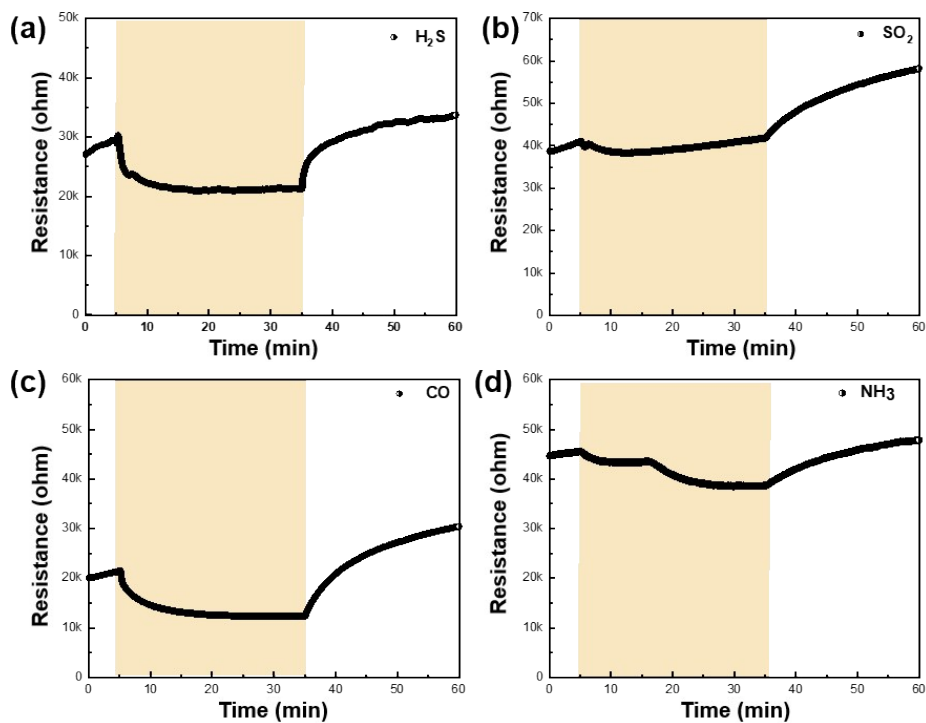

**Figure S9** Selectivity of N-GDs-SnO<sub>2</sub> towards 1 ppm (a) H<sub>2</sub>S, (b) SO<sub>2</sub> (c) CO (d) NH<sub>3</sub> gases.

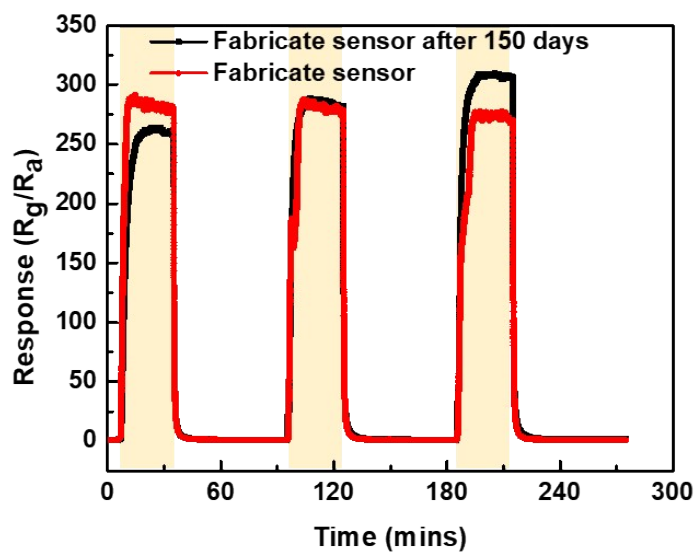

**Figure S10** long term stability N-GD-SnO<sub>2</sub> sensor after 150 days at 150°C towards 100 ppb NO<sub>2</sub>.

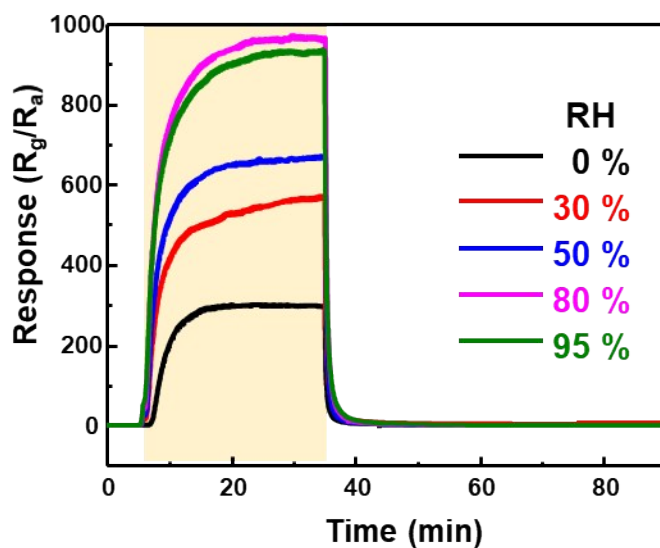

**Figure S11 (a)** Gas response of N-GD-SnO<sub>2</sub> sensor toward 100 ppb NO<sub>2</sub> as a function of relative humidity from 0 to 95 %.

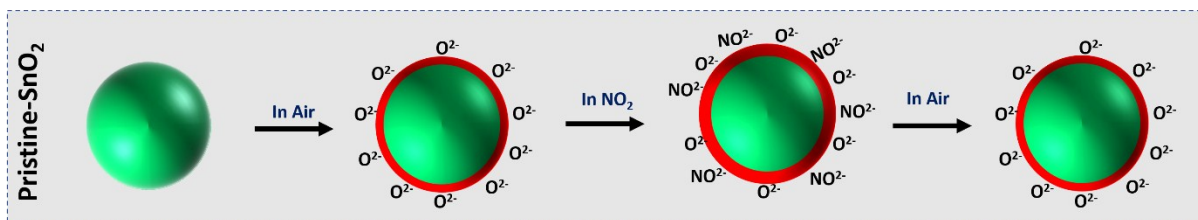

Figure S12 gas sensing mechanism of pristine SnO<sub>2</sub>.

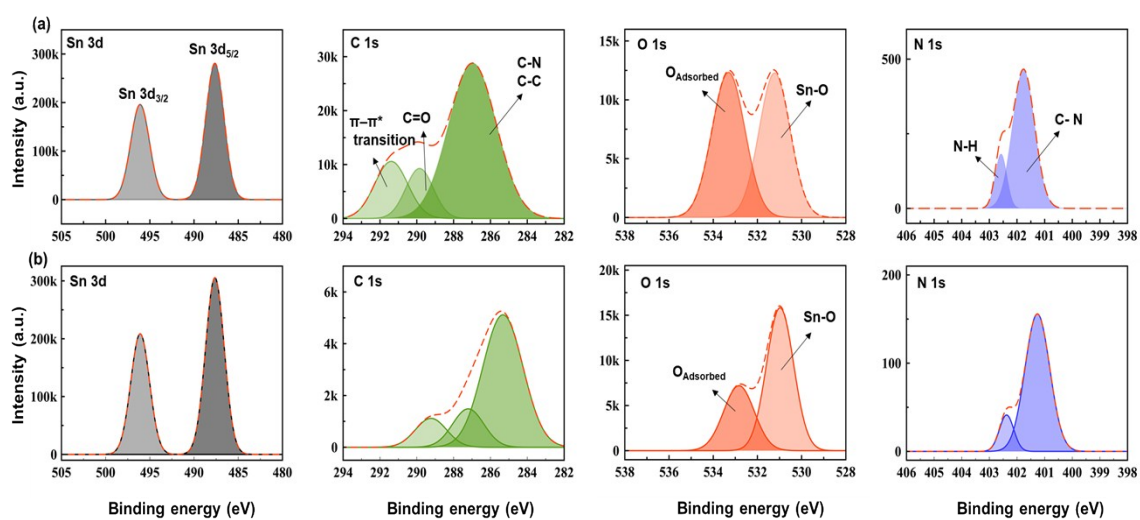

Figure S13 XPS spectra of N-GDs-SnO<sub>2</sub> (a) before and (b) after NO<sub>2</sub> exposure at room temperature.
